# Supplementary material for: Temperature-Caused Changes in Raman Pattern and Protein Profiles of Winter Triticale (x Triticosecale, Wittm.) Field-Grown Seedlings
Source: MDPI journal article supplement (doi:10.3390/molecules29091933), 2024-04-24
Supplement: s1 [file s1]

---

Article

# Temperature-caused changes in Raman pattern and protein profiles of winter triticales (x *Triticosecale*, Wittm.) field-grown seedlings

**Table 1S.** Available forms of minerals in [mg/100g of soil] or in [mg/kg of soil] determined in the soil. Tests performed at the District Chemical and Agricultural Station, Krakow, Poland (accredited laboratory, PCA AB 759).

| Laboratory code of the sample | Agronomic category of soil | pH  | Need for liming | Available forms of minerals<br>[mg/100g of soil] |                  |           | Available forms of minerals<br>[mg/kg of soil] |           |        |      |      |
|-------------------------------|----------------------------|-----|-----------------|--------------------------------------------------|------------------|-----------|------------------------------------------------|-----------|--------|------|------|
|                               |                            |     |                 | Phosphorus                                       | Potassium        | Magnesium | Boron                                          | Manganese | Copper | Zinc | Iron |
|                               |                            |     |                 | P <sub>2</sub> O <sub>5</sub>                    | K <sub>2</sub> O | Mg        | B                                              | Mn        | Cu     | Zn   | Fe   |
| GI/223/1                      | heavy                      | 6.9 | limited         | 42.0                                             | 20.0             | 13.2      | 2.35                                           | 194.0     | 6.8    | 35.5 | 1064 |
| Abundance                     |                            |     |                 | very high                                        | average          | high      | average                                        |           |        |      |      |

**Table 2S.** Nitrogen (and its forms) content in soil samples taken at a depth of 0-30 cm and 31-60 cm. Tests performed at the District Chemical and Agricultural Station, Kraków, Poland (accredited laboratory, PCA AB 759).

| Laboratory code of the sample | Dry weight of soil [%] * | Depth of the soil layer [cm] | Nitrogen content in mg/kg FW of soil ** |                                | Nitrogen content in mg/kg DW of soil ** |                                | N <sub>min</sub> content [kg/ha] *** | N <sub>min</sub> content in 0-60 cm depth of the soil layer [kg/ha] *** | Abundance |
|-------------------------------|--------------------------|------------------------------|-----------------------------------------|--------------------------------|-----------------------------------------|--------------------------------|--------------------------------------|-------------------------------------------------------------------------|-----------|
|                               |                          |                              | nitrate(V) nitrogen                     | ammonium nitrogen              | nitrate (V) nitrogen                    | ammonium nitrogen              |                                      |                                                                         |           |
|                               |                          |                              | N-NO <sub>3</sub> <sup>-</sup>          | N-NH <sub>4</sub> <sup>+</sup> | N-NO <sub>3</sub> <sup>-</sup>          | N-NH <sub>4</sub> <sup>+</sup> |                                      |                                                                         |           |
| GI/223/1                      | 78.50                    | 0-30                         | 5.58                                    | 1.77                           | 7.11                                    | 2.25                           | 36.50                                | 78.30                                                                   | average   |
| GI/223/2                      | 77.70                    | 30-60                        | 6.39                                    | 1.95                           | 8.22                                    | 2.51                           | 41.80                                |                                                                         |           |

\* according to PN-ISO 11465:1999; weight method

\*\* according to PB36(ed.3) 03.03.2020 r.; flow colorimetry method

\*\*\* according to counting

FW – fresh weight

DW – dry weight

**Table 3S.** pH, salinity and content of selected available nutrients in [mg/dm<sup>3</sup>] of the soil. Tests performed at the District Chemical and Agricultural Station, Kraków, Poland (accredited laboratory, PCA AB 759).

| Laboratory code<br>of the sample | pH in H <sub>2</sub> O | Salinity<br>NaCl [g/dm <sup>3</sup> ] | Available forms of minerals in soil [mg/dm <sup>3</sup> of soil] |                                |             |                  |      |      | [mg/dm <sup>3</sup> of soil] |
|----------------------------------|------------------------|---------------------------------------|------------------------------------------------------------------|--------------------------------|-------------|------------------|------|------|------------------------------|
|                                  |                        |                                       | N-NO <sub>3</sub> <sup>-</sup>                                   | N-NH <sub>4</sub> <sup>+</sup> | P           | K                | Ca   | Mg   | Cl <sup>-</sup>              |
| GI/223/1                         | 7.42                   | <0.10                                 | <14                                                              | 19                             | 112         | 125              | 1160 | 150  | <27                          |
| Method                           | potentiometry          | conductometry                         | potentiometry                                                    |                                | colorimetry | flame photometry |      | FAAS | potentiometry                |

Table 4S. Kendall's Tau correlation coefficients between categorical and quantitative variables.

| Variable               | Kendall's Tau correlation coefficients |                |                        |        |        |        |        |        |        |                |                 |              |       |        |       |        |        |
|------------------------|----------------------------------------|----------------|------------------------|--------|--------|--------|--------|--------|--------|----------------|-----------------|--------------|-------|--------|-------|--------|--------|
|                        | Geno<br>-type                          | Treat<br>-ment | Genotype/<br>Treatment | Fv/Fm  | Rfd    | QYmax  | NPQ    | CAT    | POX    | Cu/Zn<br>SOD I | Cu/Zn<br>SOD II | Fe/Mn<br>SOD | PrxQ  | PsbA   | PsbB  | PsbC   | PsbD   |
| Genotype               |                                        | 0.02           | 0.91*                  | -0.33* | -0.08  | -0.19* | 0.22*  | -0.08  | -0.17  | -0.07          | -0.18           | 0.17         | -0.07 | 0.06   | 0.04  | 0.00   | -0.01  |
| Treatment              | 0.02                                   |                | 0.23*                  | 0.10   | 0.19*  | 0.10   | -0.12  | -0.38* | -0.37* | -0.16          | -0.39*          | 0.31*        | 0.18  | 0.22   | -0.07 | 0.48*  | 0.49*  |
| Genotype/<br>Treatment | 0.91*                                  | 0.23*          |                        | -0.28* | -0.02  | -0.14  | 0.19*  | -0.17  | -0.22  | -0.08          | -0.24*          | 0.23         | -0.03 | 0.10   | -0.01 | 0.10   | 0.10   |
| Fv/Fm                  | -0.33*                                 | 0.10           | -0.28*                 |        | 0.04   | 0.70*  | -0.36* | -0.12  | -0.15  | 0.03           | -0.12           | 0.11         | -0.11 | 0.16   | -0.09 | 0.26*  | 0.18   |
| Rfd                    | -0.08                                  | 0.19*          | -0.02                  | 0.04   |        | 0.02   | 0.00   | -0.30* | -0.39* | -0.40*         | -0.08           | 0.00         | 0.04  | 0.11   | 0.05  | 0.36*  | 0.36*  |
| QYmax                  | -0.19*                                 | 0.10           | -0.14                  | 0.70*  | 0.02   |        | -0.09  | -0.18  | -0.13  | 0.01           | -0.20           | 0.21         | -0.10 | 0.24*  | 0.02  | 0.30*  | 0.32*  |
| NPQ                    | 0.22*                                  | -0.12          | 0.19*                  | -0.36* | 0.00   | -0.09  |        | 0.00   | 0.06   | -0.04          | 0.02            | 0.05         | 0.00  | 0.05   | 0.08  | -0.02  | -0.01  |
| CAT                    | -0.08                                  | -0.38*         | -0.17                  | -0.12  | -0.30* | -0.18  | 0.00   |        | 0.59*  | 0.38*          | 0.50*           | -0.18        | 0.07  | -0.45* | -0.14 | -0.37* | -0.41* |
| POX                    | -0.17                                  | -0.37*         | -0.22                  | -0.15  | -0.39* | -0.13  | 0.06   | 0.59*  |        | 0.55*          | 0.42*           | -0.10        | 0.09  | -0.38* | -0.11 | -0.42* | -0.41* |
| Cu/Zn SOD I            | -0.07                                  | -0.16          | -0.08                  | 0.03   | -0.40* | 0.01   | -0.04  | 0.38*  | 0.55*  |                | 0.36*           | 0.15         | -0.10 | -0.32* | -0.21 | -0.36* | -0.37* |
| Cu/Zn SOD II           | -0.18                                  | -0.39*         | -0.24*                 | -0.12  | -0.08  | -0.20  | 0.02   | 0.50*  | 0.42*  | 0.36*          |                 | -0.29*       | 0.00  | -0.59* | -0.14 | -0.45* | -0.46* |
| Fe/Mn SOD              | 0.17                                   | 0.31*          | 0.23                   | 0.11   | 0.00   | 0.21   | 0.05   | -0.18  | -0.10  | 0.15           | -0.29*          |              | 0.05  | 0.25*  | -0.03 | 0.24*  | 0.25*  |
| PrxQ                   | -0.07                                  | 0.18           | -0.03                  | -0.11  | 0.04   | -0.10  | 0.00   | 0.07   | 0.09   | -0.10          | 0.00            | 0.05         |       | 0.03   | 0.34* | 0.10   | 0.12   |
| PsbA                   | 0.06                                   | 0.22           | 0.10                   | 0.16   | 0.11   | 0.24*  | 0.05   | -0.45* | -0.38* | -0.32*         | -0.59*          | 0.25*        | 0.03  |        | 0.26* | 0.43*  | 0.46*  |
| PsbB                   | 0.04                                   | -0.07          | -0.01                  | -0.09  | 0.05   | 0.02   | 0.08   | -0.14  | -0.11  | -0.21          | -0.14           | -0.03        | 0.34* | 0.26*  |       | 0.08   | 0.15   |
| PsbC                   | 0.00                                   | 0.48*          | 0.10                   | 0.26*  | 0.36*  | 0.30*  | -0.02  | -0.37* | -0.42* | -0.36*         | -0.45*          | 0.24*        | 0.10  | 0.43*  | 0.08  |        | 0.89*  |
| PsbD                   | -0.01                                  | 0.49*          | 0.10                   | 0.18   | 0.36*  | 0.32*  | -0.01  | -0.41* | -0.41* | -0.37*         | -0.46*          | 0.25*        | 0.12  | 0.46*  | 0.15  | 0.89*  |        |

\* - significant at  $p < 0.05$

**Table 5S.** List of high confidence and high identity (>95%) genes encoding selected proteins identified in winter triticale DH1-3 seedlings by LC-MS [14] and their physical location on wheat (Wheat Chinese Spring IWGSC RefSeq v2.1 proteins, 2021) and rye (*Secale cereale* Lo7 v1 pseudomolecules, 2021) reference genomes according the GrainGenes Blast Service.

| Protein <sup>1</sup>             | Wheat Gene ID <sup>2</sup> | Position [kb] <sup>2</sup>                   | Rye gene ID <sup>3</sup> | Position [kb] <sup>3</sup>            |
|----------------------------------|----------------------------|----------------------------------------------|--------------------------|---------------------------------------|
| <b>Peroxiredoxin</b>             | TraesCS2A03G0741400        | chr2A:515270296..515273357 (+ strand)        | SECCE2Rv1G0102710        | chr2R:581072142..581075874 (+ strand) |
|                                  | TraesCS2A03G0225000        | chr2A:66150862..66153887 (- strand)          | SECCE2Rv1G0102710        | chr2R:581072142..581075874 (+ strand) |
|                                  | TraesCS2B03G0817900        | chr2B:457380068..457383196 (+ strand)        | SECCE2Rv1G0073480        | chr2R:68350578..68359657 (- strand)   |
|                                  | TraesCS2D03G0683800        | chr2D:379676742..379679937 (+ strand)        | SECCE2Rv1G0073480        | chr2R:68350578..68359657 (- strand)   |
|                                  | TraesCS3B03G0517500        | chr3B:264165958..264171143 (- strand)        | SECCE7Rv1G0504150        | chr7R:720067339..720068031 (- strand) |
|                                  | TraesCS6A02G169100         | chr6A:179123508..179124591 (+ strand)        | SECCE3Rv1G0172140        | chr3R:285120129..285124830 (- strand) |
|                                  | TraesCS7D03G0919400        | chr7D:506580135..506581528 (- strand)        | SECCE6Rv1G0388490        | chr6R:137198814..137199494 (+ strand) |
| <b>Cu/Zn SOD</b>                 | TraesCS2A02G121200         | chr2A:75734383..75737830 (+ strand)          | SECCE2Rv1G0075100        | chr2R:82905483..82907633 (+ strand)   |
|                                  | TraesCS2B02G567600         | chr2B:767298166..767302982 (- strand)        | SECCE7Rv1G0486250        | chr7R:404198541..404209486 (- strand) |
|                                  | TraesCS2D02G538300         | chr2D:622541948..622546884 (- strand)        | SECCE2Rv1G0133810        | chr2R:898525048..898529898 (- strand) |
|                                  | TraesCS4B02G243200         | chr4B:503339915..503343358 (+ strand)        | SECCE2Rv1G0133810        | chr2R:898525048..898529898 (- strand) |
|                                  | TraesCS7A02G292100         | chr7A:368707084..368723444 (- strand)        | SECCE7Rv1G0486250        | chr7R:404198541..404209486 (- strand) |
|                                  | TraesCS7D02G290700         | chr7D:345781077..345792831 (- strand)        | SECCE7Rv1G0472770        | chr7R:147581269..147586540 (+ strand) |
| <b>Fe/Mn SOD</b>                 | TraesCS2B02G567600         | chr2B:767298166..767302982 (- strand)        | SECCE2Rv1G0133810        | chr2R:898525048..898529898 (- strand) |
|                                  | TraesCS2D02G538300         | chr2D:622541948..622546884 (- strand)        | SECCE2Rv1G0133810        | chr2R:898525048..898529898 (- strand) |
| <b>Photosystem II D1 protein</b> | TraesCS1D02G071400         | chr1D:55148812..55173915 (+ strand)          | SECCE2Rv1G0095930        | chr2R:428316423..428317106 (- strand) |
|                                  | TraesCS1D02G179900         | chr1D:256966320..256967410 (- strand)        | SECCE2Rv1G0095930        | chr2R:428316423..428317106 (- strand) |
|                                  | TraesCS4A02G153400         | chr4A:321125047..321126223 (+ strand)        | SECCE6Rv1G0394910        | chr6R:310365582..310366643 (- strand) |
|                                  | TraesCS4B02G159100         | chr4B:308295572..308296255 (+ strand)        | SECCE6Rv1G0394910        | chr6R:310365582..310366643 (- strand) |
|                                  | TraesCS6D02G079900         | chr6D:67114716..67115399 (+ strand)          | SECCE6Rv1G0394910        | chr6R:310365582..310366643 (- strand) |
| <b>Photosystem II D2 protein</b> | <b>TraesCS2B02G330700</b>  | <b>chr2B:483054630..483055691 (+ strand)</b> | SECCE3Rv1G0191090        | chr3R:745941704..745942828 (+ strand) |
|                                  | TraesCS2D02G572800         | chr2D:652673942..652674409 (- strand)        | SECCE4Rv1G0266260        | chr4R:730397587..730399421 (- strand) |
|                                  | TraesCS3D02G523300         | chr3D:607870700..607871714 (+ strand)        | SECCE4Rv1G0266260        | chr4R:730397587..730399421 (- strand) |

|                                        |                           |                                              |                   |                                       |
|----------------------------------------|---------------------------|----------------------------------------------|-------------------|---------------------------------------|
|                                        | <b>TraesCS5D02G007900</b> | <b>chr5D:4960287..4960754 (+ strand)</b>     | SECCE4Rv1G0266260 | chr4R:730397587..730399421 (- strand) |
| <b>Photosystem II<br/>CP43 protein</b> | <b>TraesCS2A02G073900</b> | <b>chr2A:37021615..37021851 (+ strand)</b>   | SECCE4Rv1G0241030 | chr4R:448242238..448243105 (- strand) |
|                                        | <b>TraesCS2D02G573000</b> | <b>chr2D:652672478..652672972 (- strand)</b> | SECCE5Rv1G0376550 | chr5R:872830933..872831169 (- strand) |
| <b>Photosystem II<br/>CP47 protein</b> | TraesCS1D02G182600        | chr1D:257063901..257064993 (+ strand)        | SECCE4Rv1         | chr4R:448146966..448147956 (- strand) |
|                                        | TraesCS3A02G215700        | chr3A:404332557..404332949 (+ strand)        | SECCE5Rv1G0317190 | chr5R:338510048..338511574 (- strand) |
|                                        | <b>TraesCS3D02G053400</b> | <b>chr3D:21907250..21908670 (+ strand)</b>   | SECCE4Rv1         | chr4R:448146966..448147956 (- strand) |

1 - Amino acid sequences identified in seedlings of winter triticale lines DH1-3 by using LC-MS in Gołębiowska et al. [14].

2 - Wheat Chinese Spring IWGSC RefSeq v2.1 proteins (2021) genome in GrainGenes Blast Service.

3 - Secale cereale Lo7 v1 pseudomolecules (2021) genome in GrainGenes Blast Service.

**Table 6S.** Data obtained using AlphaFold for amino acid sequences of selected winter triticale proteins identified in seedlings of winter triticale line DH1-3 in Gołębiowska et al. [14].

| AlphaFold ID     | Protein name according to AlphaFold  | Gene according to AlphaFold | Uniprot ID | Length [AA] | Structure according to AlphaFold |             |                                                                                                                   |
|------------------|--------------------------------------|-----------------------------|------------|-------------|----------------------------------|-------------|-------------------------------------------------------------------------------------------------------------------|
|                  |                                      |                             |            |             | Model status                     | No of units | Location/domains                                                                                                  |
| A0A3B6C702_WHEAT | Thioredoxin-dependent peroxiredoxin  | Unknown                     | A0A3B6C702 | 262         | predicted                        |             | Cytoplasmic/unlocated thioredoxin and disordered domains, active site: cysteine sulfenic acid (-SOH) intermediate |
| A0A3B6B0I4_WHEAT |                                      | Unknown                     | A0A3B6B0I4 | 258         |                                  |             |                                                                                                                   |
| A0A0C4BJ55_WHEAT |                                      | CAMPLR22A2D_L<br>OCUS2968   | A0A0C4BJ55 | 258         |                                  |             |                                                                                                                   |
| A0A3B6DER7_WHEAT |                                      | Unknown                     | A0A3B6DER7 | 240         |                                  |             |                                                                                                                   |
| A0A3B6ASU3_WHEAT |                                      | Unknown                     | A0A3B6ASU3 | 247         |                                  |             |                                                                                                                   |
| A0A3B6ATP9_WHEAT | AhpC-TSA domain-containing protein   | Unknown                     | A0A3B6ATP9 | 154         | predicted                        |             | Chloroplastic superoxide dismutase copper/zinc binding domain                                                     |
| A0A3B6TIG0_WHEAT | Glutaredoxin-dependent peroxiredoxin | Unknown                     | A0A3B6TIG0 | 230         |                                  |             |                                                                                                                   |
| A0A3B6NPJ5_WHEAT |                                      | Unknown                     | A0A3B6NPJ5 | 226         |                                  |             |                                                                                                                   |
| A0A3B6ASA5_WHEAT | Superoxide dismutase [Cu-Zn]         | Unknown                     | A0A3B6ASA5 | 157         |                                  |             |                                                                                                                   |
| A0A3B6RFK1_WHEAT |                                      | Unknown                     | A0A3B6RFK1 | 201         |                                  |             |                                                                                                                   |
| A0A3B6TK25_WHEAT |                                      | Unknown                     | A0A3B6TK25 | 202         |                                  |             |                                                                                                                   |
| A0A0G2YAJ8_WHEAT |                                      | SOD2                        | A0A0G2YAJ8 | 164         |                                  |             |                                                                                                                   |
| A0A3B6IVD1_WHEAT |                                      | Unknown                     | A0A3B6IVD1 | 174         |                                  |             |                                                                                                                   |
| A0A3B6CFS9_WHEAT | Superoxide dismutase [Fe-Mn]         | Unknown                     | A0A3B6CFS9 | 225         | predicted                        |             | Mitochondrial manganese/iron superoxide dismutase N/C-terminal domain                                             |
| Q96185_WHEAT     |                                      | SOD3.1                      | Q96185     | 231         |                                  |             |                                                                                                                   |
| G1FUU8_WHEAT     |                                      | SOD                         | G1FUU8     | 231         |                                  |             |                                                                                                                   |
| PSBA_WHEAT       | Photosystem II D1 protein            | psbA                        | P12463     | 353         | predicted                        | monomer     | Multi-pass thylakoid membrane protein, 5-7 helical transmembrane chains, binding site: [CaMn4O5] clusters, Mg     |
| A0A5P8KK99_WHEAT |                                      | psbA                        | A0A5P8KK99 | 354         |                                  |             |                                                                                                                   |
| S4Z999_WHEAT     |                                      | psbA                        | S4Z999     | 353         |                                  |             |                                                                                                                   |
| A0A3B5ZT76_WHEAT |                                      | Unknown                     | A0A3B5ZT76 | 353         |                                  |             |                                                                                                                   |

|                  |                                             |         |            |     |           |         |                                                                                     |
|------------------|---------------------------------------------|---------|------------|-----|-----------|---------|-------------------------------------------------------------------------------------|
| A0A3B6HSP7_WHEAT |                                             | Unknown | A0A3B6HSP7 | 365 |           |         | of chlorophyll a Chl <sub>z</sub> D1 and PD1, pheophytin a D1, quinone B, Fe cation |
| A0A3B6C7P1_WHEAT |                                             | Unknown | A0A3B6C7P1 |     |           |         | Multi-pass thylakoid membrane protein, 5-6 helical transmembrane chains,            |
| PSBD_WHEAT       |                                             | psbD    | Q36814     |     |           |         |                                                                                     |
|                  | Photosystem II                              |         |            | 353 | predicted | monomer | binding site: Mg of chlorophyll a                                                   |
| B2CHJ7_WHEAT     | D2 protein                                  | psbD    | B2CHJ7     |     |           |         | Chl <sub>z</sub> D2 and PD2, pheophytin a D2, plastoquinone Q(A), Fe cations        |
| A0A5P8KMB2_WHEAT |                                             | psbC    | A0A5P8KMB2 | 483 |           |         | Multi-pass thylakoid membrane protein, 5-6 helical transmembrane chains             |
| S4Z090_WHEAT     | Photosystem II CP43 reaction center protein | psbC    | S4Z090     | 473 | predicted | monomer |                                                                                     |
| B2CHJ8_WHEAT     |                                             | psbC    | B2CHJ8     | 473 |           |         |                                                                                     |
| A0A3B6GPT0_WHEAT |                                             | Unknown | A0A3B6GPT0 | 385 |           |         | Multi-pass thylakoid membrane protein, 2/6 helical transmembrane chains             |
| S4Z9D7_WHEAT     | Photosystem II CP47 reaction center protein | psbB    | S4Z9D7     | 508 | predicted | monomer |                                                                                     |
| PSBB_WHEAT       |                                             | psbB    | P24065     | 508 |           |         |                                                                                     |



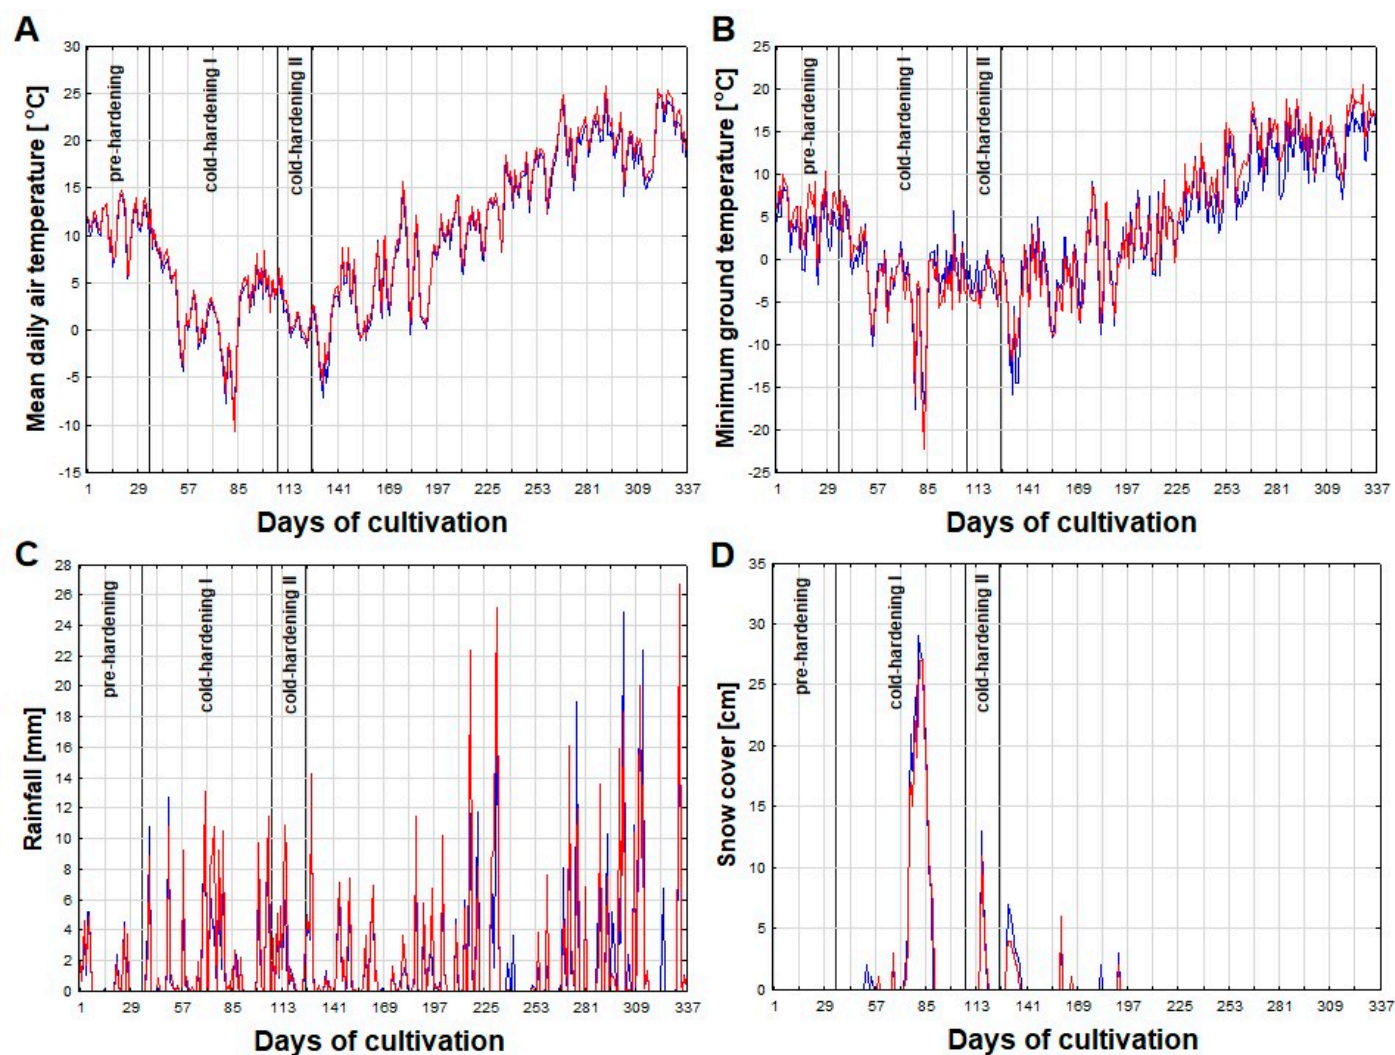

**Figure S1.** Climatic conditions: A) average daily temperature; B) daily minimum ground temperature; C) daily rainfall and D) daily snow cover depth, measured by the Kraków-Obserwatorium (red line) and Kraków-Balice (blue line) meteorological stations during the winter triticale field cultivation period from September 28, 2022 to August 31, 2023.

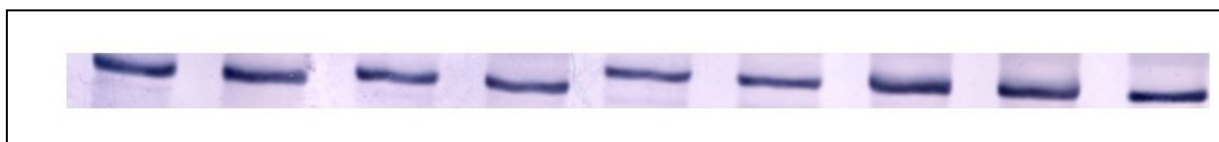

**Figure S2.** The reference immunostained blot membrane with visible PrxQ bands approx. 28 kDa.
